# Supplementary material
Source: PubMed Central journal article supplement (PMC7404439)
Supplement: NCP-35-783-s001.pdf [file NCP-35-783-s001.pdf]

# Informe de ASPEN sobre Procesos de Práctica de Soporte Nutricional con COVID-19: Primera Respuesta. Mayo 2020.

*Traducido por CELAN con permiso de la American Society of Parenteral and Enteral Nutrition (ASPEN) ASPEN no respalda el uso de este material en ninguna otra forma que no sea su totalidad y en el idioma inglés como se publicó originalmente*

Diana Wells Mulherin, PharmD, BCNSP; Renee Walker, MS, RDN, LD, CNSC, FAND; Beverly Holcombe, PharmD, BCNSP, FASHP, FASPEN; Peggi Guenter, PhD, RN, FAAN, FASPEN; and the ASPEN Clinical Practice Committee

*Autor Correspondiente: Beverly Holcombe, [beverlyh@nutritioncare.org](mailto:beverlyh@nutritioncare.org)*

## **Resumen**

COVID-19 ha cambiado los procesos de cuidado nutricional en hospitales y en el hogar. Este documento resume los reportes clínicos sobre la modificación de los procesos, incluida la atención nutricional en general, la evaluación nutricional, los pasos de atención de nutrición enteral y parenteral y la entrega de alimentos y suplementos orales. También se incluyen temas de enseñanza, logística y personales relacionados a los cambios en el entorno laboral. Por lo tanto, es necesario, ante la modificación de modelos de atención, emplear procesos seguros y estandarizados basados en la evidencia.

## **Introducción**

Con la pandemia sin precedentes de COVID-19 a principios de 2020, se produjeron cambios rápidos en las prácticas de atención médica que exigieron una mayor demanda de soporte nutricional. En respuesta a esta necesidad, el presidente de la Sociedad Americana de Nutrición Parenteral y Enteral (ASPEN por sus siglas en inglés) solicitó una revisión centrada de las prácticas actuales de nutrición clínica. Esta tarea se le asignó al Comité de Práctica Clínica de ASPEN y se contactó por correo electrónico a muchos profesionales de la salud y otros líderes para obtener información sobre la práctica actual. Estos datos cualitativos se recopilaron durante abril del 2020. Debido a que la literatura es limitada en esta población específica de pacientes, las prácticas actuales a menudo se extrapolan de publicaciones anteriores y se equilibran con las limitaciones de seguridad y recursos en este campo. El propósito de este documento es reflejar los procesos de práctica de soporte nutricional en estos tiempos. Estas notas del campo reflejan 27 informes clínicos sobre prácticas de atención domiciliaria, ambulatoria y en hospitales. Los informes incluyen tópicos relacionadas con evaluación nutricional, nutrición enteral (NE) y nutrición parenteral (NP), así como otras prácticas de nutrición clínica, tales como la enseñanza a pacientes y estudiantes en práctica clínica, entrega de alimentos, tecnología y estrés del personal. Las prácticas de NP y NE se han organizado en torno a los pasos publicados del Proceso del Empleo de NP y NE. Cualquier recomendación en este documento no constituye una asesoría médica o de otro profesional y no debe tomarse como tal.

La información publicada en este documento tiene por objeto ayudar en el cuidado de los pacientes y proviene de las recomendaciones que dan profesionales de la salud que han realizado atención médica a pacientes; su concepto es el componente principal de una atención médica de calidad. La información que acá se presenta no sustituye el ejercicio de dicho juicio por parte del profesional de la salud. Las circunstancias en los entornos clínicos y las indicaciones del paciente pueden requerir acciones diferentes a las recomendadas en este documento y, en esos casos, debe prevalecer el juicio del profesional tratante. Este documento fue aprobado por la Junta Directiva de ASPEN.

Inicialmente, cuando COVID-19 se presentó a los profesionales de la salud, se hizo evidente una mayor demanda de soporte nutricional. En pacientes hospitalizados con neumonía por COVID-19, el 42% desarrolló síndrome de dificultad respiratoria aguda (SDRA) y permanecieron en ventilación mecánica durante un promedio de aproximadamente 10 días, y muchos de ellos fallecieron<sup>1</sup>. En el estudio de 5700 pacientes hospitalizados en Nueva York, el 14% fueron tratados en la unidad de cuidados intensivos (UCI), el 12% requirió ventilación mecánica y el 3.2% requirió terapia de reemplazo renal. La tasa de mortalidad general en esta cohorte fue del 21% con una tasa de mortalidad del 88% en los pacientes con ventilación mecánica<sup>2</sup>. Los pacientes con frecuencia experimentan hipermetabolismo durante la fase aguda de la infección, lo que conduce a una deuda energética y pérdida de masa corporal magra. Estos pacientes que no pueden comer por vía oral, debido a la ventilación mecánica, requieren nutrición enteral y / o parenteral<sup>3</sup>. Si bien el número de casos se puede estar nivelando o incluso disminuyendo al momento de la publicación de este documento, el Director de los Centros para la Enfermedad Control y Prevención (CDC por sus siglas en inglés) establece que una segunda ola de la infección por COVID-19 probablemente ocurrirá a fines de 2020 y hasta 2021 antes de que una vacuna pueda estar ampliamente disponible. Dicho esto, estas lecciones aprendidas y los ajustes realizados en la práctica clínica serán útiles en el futuro.

### ***Resumen de las Prácticas de Atención Nutricional***

La atención nutricional general ha cambiado drásticamente para aquellos pacientes que generalmente acuden al consultorio u otro servicio de salud. Muchos profesionales de la salud de servicios ambulatorios informaron que se les habían aprobado y proporcionado acceso a tecnología y herramientas para trabajar desde casa, ver pacientes a través de chats de video y por teléfono. Los Centros de Servicios de Medicare y Medicaid (CMS por sus siglas en inglés) proporcionaron detalles sobre la ampliación de las flexibilidades otorgadas a los Centros de Salud Calificados Federalmente y a las Clínicas de Salud Rural para la prestación de los servicios de telesalud, según lo permitido por la Ley de Ayuda, Alivio y Seguridad Económica por Coronavirus (CARES por sus siglas en inglés) para los beneficiarios de Medicare<sup>4</sup>. Entre los servicios de telesalud aprobados se encuentran la terapia nutricional y el autocontrol de la diabetes, los que se pueden brindar desde cualquier lugar, incluso en el hogar. Algunas dificultades con la atención por telemedicina en el hogar implican el poder coordinar la cita con el paciente y hacer que cumplan con la visita de telesalud. Estos desafíos pueden conducir a una disminución de la calidad de las consultas externas. Las citas pueden durar menos tiempo siendo más difícil proporcionar materiales educativos. Los profesionales de la salud tienen menor número de pacientes referidos porque se atienden más pacientes a nivel de atención primaria y por parte de prestadores/ profesionales de la salud especializados. Una ventaja de la telesalud incluye ver a toda la familia en su entorno familiar, que a menudo proporciona una perspectiva diferente. Afortunadamente, gran parte del examen físico se puede hacer por video. La telesalud ha sido una buena alternativa para las familias que viven a grandes distancias del hospital o del centro de salud donde reciben atención y seguimiento.

### ***Profesionales de la Salud de Soporte Nutricional***

Antes de la pandemia de COVID-19, en muchos hospitales el equipo interdisciplinario de soporte nutricional pasaba revista a los pacientes de la unidad de cuidado intensivo (UCI) que recibían terapia NE o NP. El equipo estaba formado por médicos, farmacéuticos, enfermeras y nutricionistas-dietistas. El equipo podía ingresar a la habitación de un paciente, examinarlo y verificar la fórmula enteral y / o la mezcla de nutrición parenteral, así como confirmar la precisión de las bombas de infusión NE o NP. La experiencia y la investigación sobre la terapia de soporte nutricional en pacientes con COVID-19 ha generado nuevos procesos de práctica de atención médica que incluyen telemedicina, equipo de protección personal (EPP) y limitar la exposición. Los profesionales de la salud involucrados en la atención al paciente deben seguir los estándares de EPP y de cuidado centralizado/unificado para limitar la exposición al COVID-19. El cuidado centralizado/unificado hace referencia a ofrecer toda la atención médica necesaria con la menor cantidad de contactos (hacer que un profesional de la salud realice tantas tareas de atención al mismo tiempo como sea posible) para limitar la exposición<sup>3</sup>. En pacientes con infección por COVID-19 confirmada o sospechada se deben seguir las indicaciones apropiadas de cuidado nutricional.

Para reducir el riesgo de exposición del profesional de la salud, todo el equipo de soporte nutricional ya no ingresa a la habitación del paciente. El médico tratante va a ver a los pacientes y lo hace solo cuando sea necesario. Los profesionales de la salud informan que, si un paciente está con precauciones de contacto o algún tipo de aislamiento, el encargado de la administración de soporte nutricional no ve al paciente a menos que sea absolutamente necesario para ahorrar los EPP. Algunos hospitales han dividido los equipos de soporte nutricional y alternan las semanas de trabajo desde casa.

Las personas encuestadas refieren que en sus lugares de trabajo les han ofrecido la posibilidad de hacerlo en forma remota y en caso de una reducción drástica, optar por licencias. Un profesional de la salud informó que la mayoría del personal trabaja de forma remota y son solo unos pocos quienes permanecen en el hospital para que cuando se necesite, puedan ser los ojos y los pies de quienes trabajan a distancia. La decisión fue mantener a los mismos profesionales de la salud trabajando en el sitio y no rotarlos, ya que estaban "potencialmente expuestos", mientras que quienes trabajaban a distancia no habían tenido exposición alguna.

A los médicos de soporte nutricional para pacientes hospitalizados que trabajan desde su hogar se les ha dificultado participar en las rondas o revistas de atención al paciente. En algunos casos los llaman para participar en ellas y sin importar la ubicación física, las rondas de equipo se pueden realizar mediante videoconferencia. Incluso si los profesionales de la salud se encuentran físicamente en el hospital, mantienen el distanciamiento social y se quedan en sus respectivas oficinas para asistir a rondas a través de videoconferencia. Los profesionales de la salud que trabajan en nutrición también utilizan las conferencias telefónicas o de video para reunirse con los equipos médicos de asistencia primaria para ver a los pacientes en conjunto y limitar el ingreso a las habitaciones con el objeto de minimizar la exposición al COVID-19.

Los hospitales han implementado la tamización de síntomas para todos los empleados que llegan al sitio, así como la utilización de tapabocas. Algunas instituciones tienen recursos suficientes para evaluar a todas los nuevos pacientes admitidos y hospitalizados por COVID-19, independientemente de los síntomas. Otros evalúan solo pacientes sintomáticos para poder saber de forma temprana si un paciente se vuelve negativo debido a una factibilidad de un cambio rápido en los resultados de las pruebas de laboratorio. Algunos otros profesionales de la salud informan que el personal hospitalario continúa yendo a trabajar en el hospital y no lo hacen desde la casa. Claramente, no existe una práctica estandarizada en esta área y las recomendaciones están cambiando con frecuencia.

## ***Evaluación nutricional***

En el entorno hospitalario, no se recomienda a los nutricionistas-dietistas ingresar a las UCI o salas de aislamiento de los pacientes para realizar una evaluación nutricional centrado en el examen físico (NFPE por sus siglas en inglés). Algunos están implementando un NFPE modificado y dependen de otros profesionales para recopilar los datos físicos de los pacientes. Al trabajar de forma remota, se espera que los nutricionistas-dietistas realicen evaluaciones nutricionales, que excluyan el NFPE práctico, brinden educación al paciente y la familia, y documenten la información. Los nutricionistas-dietistas pueden contactar a los pacientes por teléfono para obtener información acerca de la evaluación. Sin embargo, esto a veces se dificulta, especialmente en aquellos los pacientes que no pueden participar en una entrevista telefónica. En forma alternativa, los profesionales de la salud llaman a los miembros de la familia para recopilar información de fondo cuando el paciente no puede contestar la llamada en persona. Con frecuencia, es difícil ponerse en contacto con pacientes y el equipo de salud encargado del cuidado directo, por lo tanto, la documentación de las evaluaciones nutricionales se basa en la revisión de las historias clínicas. Los miembros del equipo que están en el hospital ayudan a aquellos que trabajan a distancia entregando materiales educativos, realizando NFPE según lo permitido e ingresando las órdenes que solo pueden hacerse a través de sistemas que no están disponibles de forma remota. Para los NFPE, los profesionales de la salud realizan exámenes visuales que se limitan a 5 áreas, las extremidades superiores e inferiores y las áreas faciales. Los profesionales de la salud que trabajan con nutrición confían en la enfermera del paciente para obtener información sobre áreas que no pueden ver, tales como la piel e informan que las evaluaciones de seguimiento se han modificado debido al personal limitado. Algunos nutricionistas-dietistas informan que los pacientes con infección por COVID-19 se encuentran en salas de presión negativa y, por lo tanto, no necesitan usar EPP completos dentro de la unidad de atención al paciente lo cual permite un mayor acceso a otros profesionales de la salud. En general, se necesita una mayor comunicación con los cuidadores directos, especialmente con las enfermeras de cabecera para confirmar lo que está sucediendo con los pacientes. El peso corporal a menudo no se obtiene o incluso no se solicita con el objeto de tratar de minimizar la interacción con los pacientes infectados. Las recomendaciones energéticas se basan únicamente en ecuaciones predictivas debido a que la calorimetría indirecta no se recomienda por diferentes razones, tales como el riesgo de contaminar el equipo, el mayor tiempo del personal con el paciente infectado y el mayor uso de EPP.

## ***Pasos del Proceso de la Implementación de Nutrición Enteral***

Las recomendaciones nutricionales para pacientes en estado crítico incluyen el inicio temprano de la NE, dentro de las 24-36 horas posteriores a la admisión en la UCI o dentro de las 12 horas posteriores a la intubación<sup>3</sup>. La administración de NE temprana en los pacientes de la UCI ha mostrado una menor mortalidad y una reducción de infecciones cuando se compara con la NE tardía<sup>5,6</sup>. En las guías de cuidado crítico de ASPEN y la SCCM (Society of Critical Care Medicine, por sus siglas en inglés) del 2016 se citó un meta-análisis de 2000-2013 que demostró un menor riesgo de infección con la NE en comparación con el uso de NP en pacientes de la UCI<sup>5</sup>. Se ha demostrado que administrar NE es seguro en la mayoría de los pacientes de la UCI cuando se emplea un vasopresor estable a dosis baja<sup>7</sup>. La provisión de NE en los pacientes con COVID-19 se examinará utilizando el Proceso de Implementación de la NE y se evaluará dónde hay alteraciones. Los pasos incluyen 1) evaluación del paciente, su acceso enteral y recomendación de una terapia 2) prescripción de la NE 3) revisar la orden, 4) adquirir, seleccionar, preparar, etiquetar, administrar la fórmula y el equipo de la NE, 5) administrar la NE y por último 6) monitorear y reevaluar al paciente<sup>8</sup> Ver Figura 1.

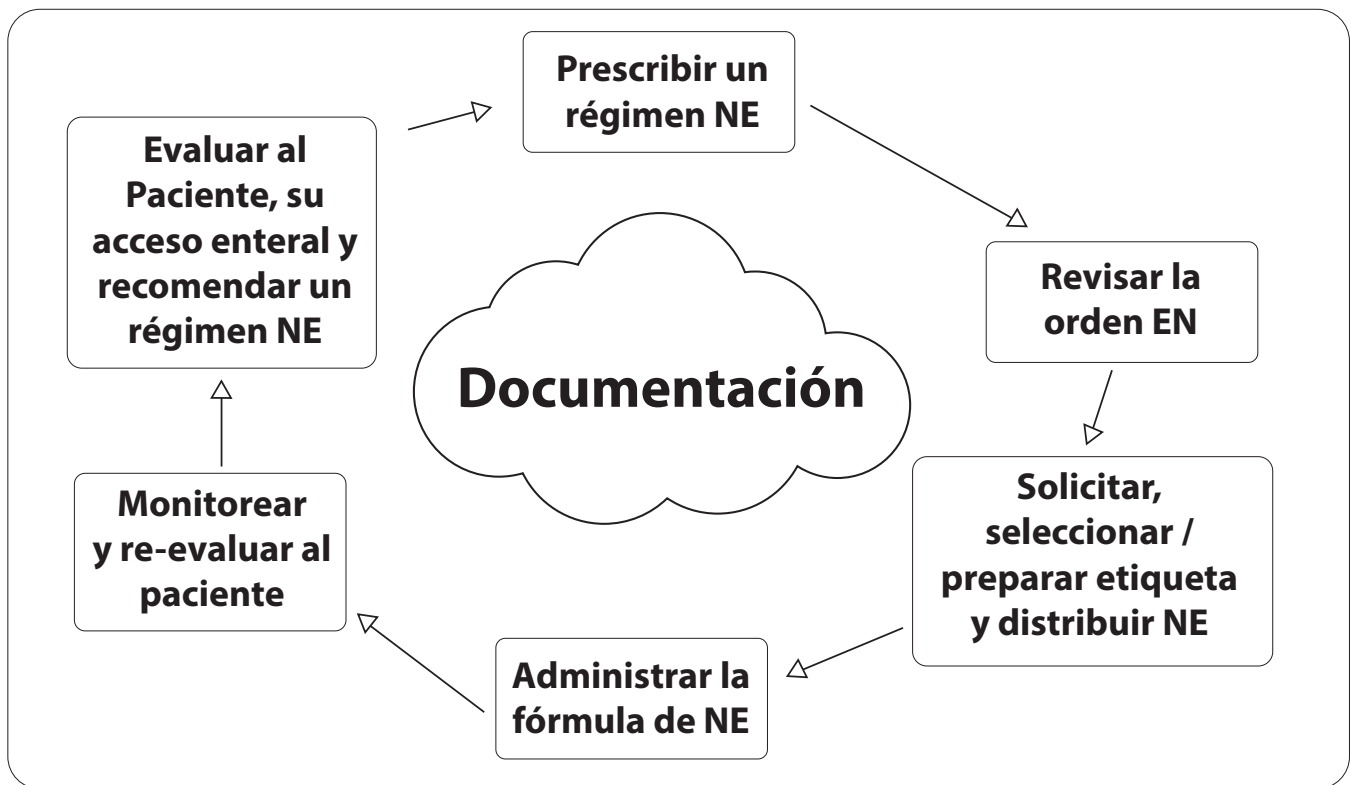

**Figura 1. Proceso de Implementación de Nutrición Enteral**

Reprinted from Boullata JI, et al. ASPEN safe practices for enteral nutrition therapy. JPEN J Parenter Nutr. 2017;41(1):15–103.

### *Acceso enteral*

A los pacientes en estado crítico se les puede colocar una sonda nasogástrica (SNG) para descompresión gástrica; la cual se puede usar luego para la nutrición enteral cuando la descompresión no sea necesaria. Reemplazar la SNG de succión con una de alimentación naso entérica aumenta el riesgo de contaminación del personal<sup>3</sup>. Otro problema es la colocación de la sonda de gastrostomía endoscópica percutánea (PEG por sus siglas en inglés). Los encuestados informaron que en los centros hospitalarios no se están colocando PEGs debido al alto riesgo de COVID-19 sino SNGs para NE. Estas están siendo utilizadas por un tiempo mayor en comparación a lo que se hacía anteriormente. A aquellos pacientes que tienen sondas de gastrostomía o de yeyunostomía que necesitan reemplazo, se les retrasa el procedimiento tanto como sea permisible. Es posible que el radiólogo intervencionista no pueda realizar cambios electivos de sondas gástricas o de yeyunostomía debido al riesgo de contaminación del personal, del equipo y del empleo de EPP. Si un paciente ambulatorio tiene un problema con una sonda de alimentación enteral, puede ser dirigido al departamento de urgencias para evaluación y hacerle una radiografía.

### *Recomendar y prescribir un régimen de NE*

Los profesionales de la salud en nutrición informan que se comunican entre sí a través de un sistema de texto seguro compatible con HIPAA (Health Insurance Portability and Accountability Act por sus siglas en inglés). También comentan que los médicos y profesionales avanzados confían más en los nutricionistas-dietistas para ingresar órdenes para NE y bolos de agua en el sistema de registro electrónico de salud (EHR por sus siglas en inglés).

### *Adquisición, selección, preparación, etiquetado y administración de la fórmula de NE y del equipo*

Los profesionales de la salud informaron que están experimentando escasez de fórmulas para NE por lo que han recurrido al empleo de fórmulas de NE que de otro modo no se hubieran seleccionado. La escasez de bombas para NE es debido a una mayor demanda, pues las necesidades se incrementaron a más del doble, en comparación con lo normal. Los pacientes con ventilación mecánica constituyen la mayoría de los pacientes con NE. La práctica general es infundir NE continua para pacientes con ventilación mecánica. Cuando no hay disponibilidad de bombas, y un paciente necesita un régimen continuo de NE, se proporciona mediante infusión por gravedad con la velocidad programada mediante la llave reguladora para ajuste de flujo en lugar de una bomba enteral. Si un paciente ya no necesita un régimen de alimentación continua de NE, la alimentación en bolo es un método alternativo de administración. Debido a la disponibilidad limitada de la variedad habitual de los empaques de fórmulas para NE, se están empleando para la alimentación en bolos, los Tetra Paks, así como los contenedores/bolsas listas para colgar.

### *Administración de la NE*

Debido a la alta incidencia de SDRA, se está colocando más pacientes en posición de decúbito prono (llamado pronación) y ha aumentado la necesidad de educar a las enfermeras y al equipo de salud de atención primaria sobre la seguridad y el manejo de adecuado de la NE en pacientes en posición de decúbito prono. Algunos profesionales de la salud que trabajan en nutrición informan que el personal de la salud no se siente cómodo con la NE en posición prona debido a la preocupación por el riesgo de aspiración. Esto puede conducir a que existan largos períodos sin que el paciente reciba una ingesta nutricional adecuada. Las enfermeras que atienden a pacientes con infección por COVID-19 con dificultad respiratoria pueden sentir la necesidad de suspender la NE durante 1 hora antes de colocarlos en posición prona; sin embargo, los expertos de nutrición en cuidado crítico han comentado recientemente que esta práctica puede ser innecesaria<sup>9</sup>.

El personal de la UCI está tratando de mantener todas las bombas de infusión, incluidas las bombas EN fuera de las habitaciones de los pacientes. Esto requiere disponer de extensiones de los equipos suficientemente largas y se generan dudas de seguridad, por el peligro de tropezar con el equipo y porque se encuentra en el piso. También existe preocupación por la escasez de las extensiones. Otros sugieren compartir las bombas de NE en pacientes que reciben alimentación por bolos o NE cíclica. Como una estrategia práctica para abordar la necesidad de cuidado centralizado descrita en el documento SCCM / ASPEN<sup>3</sup> un médico sugirió administrar todas las proteínas y suplementos modulares diarios al mismo tiempo en aquellos pacientes que lo requieren como parte de su régimen de NE. Si bien esto es siempre un enfoque útil para minimizar el tiempo de enfermería adicional requerido para la administración de la NE, ahora es de especial importancia para limitar la exposición de la enfermera a los pacientes con COVID-19. Por ejemplo, en lugar de recibir un sobre de proteína tres veces al día, (los pacientes reciben 3 sobres una vez al día) para proporcionar la misma dosis diaria con exposición menor de las enfermeras. Se debe determinar la tolerancia y la eficacia de concentrar los módulos de nutrición en una sola toma.

### *Monitoreo y reevaluación del paciente*

Los profesionales de la salud informan que les hace falta ver a los pacientes. Es posible que se haya ordenado un régimen de NE, pero debido a la escasez de bombas o de contenedores de administración, el régimen prescrito puede no estarse administrando. También existe la posibilidad de pasar por alto detalles ya que hay un intervalo de tiempo desde que un miembro del equipo ve al paciente y documenta sus hallazgos y observaciones. Se obtiene una gran

cantidad de información mediante un examen visual que aún no se ha documentado en el EHR. El otro factor sorprendente es cuán inestable son estos pacientes y con qué frecuencia cambian su estado y, por lo tanto, las necesidades de nutrición y seguridad. En casos de cambios hemodinámicos, modificaciones en la dosis de los medicamentos vasopresores y / o dificultades con la sincronización mecánica del ventilador, es posible que los pacientes deban monitorearse mucho más de cerca. La NE a menudo se suspende con poca documentación en el EHR, por lo que se hace difícil cuantificar el aporte de nutrición. La mejor opción para monitorear al paciente es la ayuda de un colega in situ o un miembro del equipo que vaya a ver físicamente a los pacientes y anote los puntos de evaluación que no se pueden obtener a través del EHR. Tal como sucede con la evaluación nutricional al inicio, se debe comunicar con la enfermera de cabecera ya que está sirviendo como punto de contacto de primera línea para los otros equipos.

### *Nutrición Enteral Ambulatoria*

La educación, la entrega de suministros y atención, y el monitoreo de pacientes que reciben NE en el hogar ha sido un desafío. Algunas compañías de atención domiciliaria informan que su cadena de suministro de NE aún no se ha visto afectada por COVID-19 y que se están realizando todas las entregas a domicilio. Brindar educación a los pacientes que son dados de alta de la atención hospitalaria al hogar con terapia de NE, ha sido difícil para el personal encargado.

Debido a las restricciones de vendedores y visitantes, agravadas por el temor del cuidador de ingresar al hospital (si está permitido), los profesionales de la salud de atención domiciliaria están utilizando tecnología de telesalud junto con el apoyo de los nutricionistas-dietistas del hospital para proporcionar a los pacientes educación sobre las bombas de NE, el régimen de alimentación, administración y cuidado de la sonda. Los profesionales de la salud están utilizando telesalud para enseñar la administración básica de alimentación de NE y el cuidado del sitio de inserción de la sonda de alimentación. En un caso reportado, un bebé necesitaba comenzar alimentación ambulatoria a través de una SNG. Normalmente, ese niño habría tenido que ser ingresado en el hospital para iniciar la alimentación con NE, pero la familia tenía mucho miedo de ir al hospital debido al riesgo de infección por COVID-19, por lo que el médico colaboró con una compañía de atención domiciliaria y pudo hacer un inicio virtual. La SNG se colocó en el consultorio del médico y la compañía de atención domiciliaria realizó una visita virtual para enseñar a la familia acerca de la alimentación, la bomba y los suministros de NE. Estos últimos se entregan en la casa sin contacto directo con el paciente.

En casa, el peso de los pacientes y otras medidas antropométricas han sido difíciles de obtener. En el hogar, algunas familias no tienen los recursos para comprar una báscula y el médico debe trabajar con servicios ambulatorios de salud para obtener una báscula para el paciente. Para los niños mayores, se puede usar una balanza para adultos, o los padres pueden sostener al niño y luego pesarse y restar el peso de los padres para obtener el peso del niño. Sin embargo, este método no es lo suficientemente preciso para los bebés. Pesar a los pacientes que están en silla de ruedas o que son demasiado pesados para levantarlos, es muy difícil. A veces, acuden al consultorio o un servicio de salud para pesarse y todos los involucrados toman las precauciones necesarias, tales como distanciamiento social y el uso de tapabocas.

Los profesionales de la salud informan que las visitas virtuales son ideales para el seguimiento de pacientes estables y sin ningún síntoma agudo que requiera una evaluación cercana en persona. El contacto cara a cara y la capacidad de hacer un examen exhaustivo sigue siendo esencial para los nuevos pacientes y aquellos que están gravemente enfermos. Otro problema observado fue la disminución en la frecuencia entre las visitas de los pacientes, particular-

mente durante la conversión de las visitas al consultorio a las citas de telesalud. Queda por ver la importancia de estas brechas en la atención, pero los pacientes pueden estar recibiendo menor atención de la que necesitan. Utilizar visitas virtuales puede convertirse en un cambio más permanente en la práctica en general, incluso después de la resolución de esta pandemia.

La Fundación Oley, una organización 501 (c) (3) nacional, independiente y sin fines de lucro, se esfuerza por mejorar las vidas de quienes viven con nutrición intravenosa en el hogar (parenteral) y alimentación por sonda (enteral) a través de la educación, el apoyo y la creación de redes. Recientemente, llevaron a cabo una encuesta entre sus usuarios de NE y NP que preguntaban sobre las entregas a domicilio, los suministros y el acceso a la atención. Los resultados de la encuesta se pueden encontrar en <https://oley.org/page/covid19results>.

### **Pasos del Proceso de Implementación de Nutrición Parenteral**

Cuando la nutrición enteral no es una opción, existe la necesidad de cambiar a nutrición parenteral (NP) en pacientes críticos infectados con COVID-19 <sup>3,5,6</sup>. La incapacidad para alimentarse por vía entérica puede ser por íleo persistente, signos de íleo prolongado, o aquellos con complicaciones hemorrágicas gastrointestinales por COVID-19. Las barreras para cambiar a NP o suplementar NE con NP para el paciente con infección por COVID-19 puede ser menor que para otros pacientes críticos, especialmente cuando la NE no es segura o no se tolera. Los pacientes intubados con COVID-19 generalmente requieren una estadía prolongada en la UCI y, sin una nutrición adecuada, incurrirán en grandes défi-

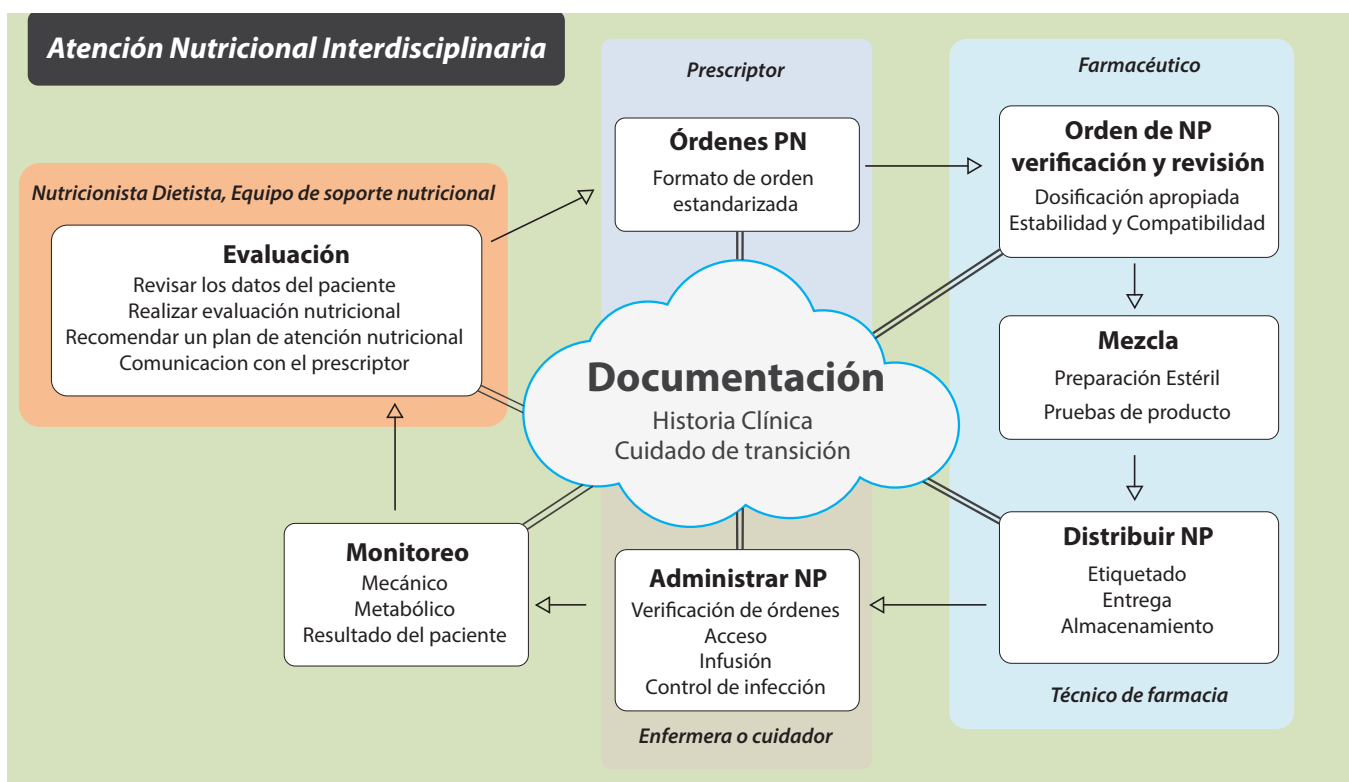

**Figura 2. Cuidado Nutricional Interdisciplinario.**

Reprinted from Boullata JI. Overview of the parenteral nutrition use process JPEN J Parenter Enteral Nutr. 2012;36 (2S):10S-13S.



cits de energía y proteínas. A medida que mejora la condición del paciente, se debe volver a intentar la NE gástrica. Estas recomendaciones varían ligeramente de las declaraciones hechas en las directrices de 2016<sup>5</sup>.

El Proceso de implementación de NP incluye los siguientes pasos: 1) evaluar al paciente 2) prescribir la NP 3) revisar la orden 4) mezclar y enviar 5) administrar y 6) monitorear la tolerancia del paciente a la terapia<sup>10</sup>. Ver Figura 2.

### *Evaluación del paciente*

La NE temprana puede no ser preferencial en un subconjunto de pacientes con COVID-19 con alteraciones gastrointestinales<sup>3</sup>. Cuando la NP se usa en forma temprana, la revisión del empleo de la NP y la transición a NE debe ocurrir cuando los síntomas gastrointestinales disminuyen. Los equipos de soporte nutricional evalúan e identifican el síndrome de realimentación en aquellos pacientes con desnutrición preexistente u otros factores de riesgo. También monitorean a pacientes con SDRA que requieren ventilación mecánica para evaluar si pueden tolerar NE. En pacientes con COVID-19, ha habido un aumento en la trombosis, la desnutrición y la insuficiencia renal, en ellos la terapia con NE se ajusta en caso necesario. Algunas organizaciones de atención médica informan un menor número de pacientes con NP y sospechan que la disminución puede tener relación directa con la reducción de cirugías electivas que se realizan.

La historial nutricional y otra información pertinente que no figura en el EHR se obtienen por teléfono a partir del paciente, la familia, la enfermera de cabecera o el equipo primario (en orden de preferencia). En un intento de obtener información directamente del paciente en primera instancia, se puso a disposición en la EHR el número de teléfono de la habitación y se agregó a la lista del censo de NP.

### *Prescripción de la NP*

El único cambio significativo en la prescripción de la terapia de NP está relacionado con la selección en el tipo de emulsiones inyectables de lípidos (EIL) a base de aceite de soya, a productos alternativos de EIL que tienen un perfil más bajo de ácidos grasos proinflamatorios. Esto fue reiterado en las recomendaciones recientes de ASPEN y SCCM para los pacientes infectados con COVID-19<sup>3</sup>.

### *Revisión de la orden de NP, Mezcla y Envío de la NP*

Los profesionales de la salud hacen ajustes en la revisión de las órdenes y mezcla sin comprometer las prácticas para la terapia segura de NP11. Un centro informó un cambio para usar más productos de bolsas multicámara de NP, debido a la necesidad de disminuir el tiempo de mezcla en el área estéril tanto del técnico como del químico farmacéutico, con el fin de reducir el empleo de EPP y transferir recursos a otras responsabilidades de farmacia. En términos del suministro de componentes PN, dos grandes fabricantes colocaron sus productos en reserva para controlar la distribución en caso de una mayor demanda. Otras compañías no informan de una escasez general. Algunos profesionales de la salud informan que el mayor desafío es mantener un almacenamiento adecuado de medicamentos, líquidos intravenosos y electrolitos, incluidos calcio, potasio y fósforo para pacientes con COVID-19 que requieren terapia de reemplazo renal continua, junto con antibióticos, bloqueadores neuromusculares y sedantes para estos pacientes.

### *Administración de la NP*

En los pacientes con COVID-19, se intenta consolidar los tiempos de administración de medicamentos, por lo que puede ser necesario modificar el tiempo estándar de administración para NP. Las bombas inteligentes están fuera de las habitaciones de los pacientes para que las enfermeras puedan controlar la configuración desde la distancia.

Al igual que con las bombas, existen preocupaciones tales como tropezar con los equipos de infusión, determinar el volumen de purgado necesario y la falta de extensiones. Para estas infusiones, incluida la NP, las enfermeras cubren el equipo con una capa protectora, ya que podría tocar el piso, una consideración importante desde el punto de vista del control de infecciones<sup>12</sup>.

### *Monitoría*

Algunos pacientes con COVID-19 desarrollan rápidamente hipertrigliceridemia. En pacientes que reciben propofol o NP con ILE, se obtienen concentraciones séricas de triglicéridos al inicio y dentro de las 24-48 horas de iniciar la terapia.

### *NP en casa*

Un profesional de la salud compartió que su equipo de NP ambulatoria sigue a unos 130 pacientes en forma simultánea. Casi la mitad de estos pacientes tienen dependencia de NP a largo plazo. Este equipo tiene un consultorio de NP interdisciplinario donde se atienden a los pacientes ambulatorios y con el COVID-19 esta se encuentra cerrada. El equipo se adaptó a una visita clínica virtual utilizando un servicio de conferencia disponible en la nube. El médico, la enfermera, el nutricionista-dietista y el farmacéutico acceden a la plataforma desde su ubicación respectiva antes de cada paciente programado, y luego el paciente (y los cuidadores) se unen a la conferencia a la hora señalada. En general esto ha funcionado bien, a excepción de la incapacidad para realizar un examen físico y ver lo que los pacientes puedan realizar y ejecutar. De hecho, el equipo está considerando usar este formato de visita virtual en el consultorio después de que se levanten las restricciones relacionadas con COVID-19, en aquellos pacientes cuya ubicación geográfica o condiciones clínicas les impida asistir en persona a las visitas clínicas domiciliarias de NP.

Algunos servicios de soporte nutricional en el hogar pasaron con facilidad a trabajar de forma remota durante la pandemia de COVID-19. Por ejemplo, un servicio ya tenía a un miembro del personal que trabajaba desde su casa cada semana y era responsable de revisar los resultados de laboratorio, contactar al equipo de salud tratante y realizar cambios en los aditivos de la NP en el hogar. La información para apoyar a los pacientes con NP ambulatoria generalmente está disponible electrónicamente, tales como, registros médicos, resultados de laboratorio e información educativa, y por lo tanto se necesitaban cambios mínimos en los flujos de trabajo. El servicio de urgencias de 24 horas para los pacientes con NP domiciliaria que necesitan tratamiento por complicaciones metabólicas y de catéter urgentes no ha cambiado con el COVID-19. Para respetar el distanciamiento social, el médico y la nutricionista-dietista ya no realizan la visita en conjunto en el mismo consultorio. El nutricionista-dietista completa una parte de la visita con el paciente, lo documenta en el EHR y luego envía la información pertinente al médico (según las operaciones normales). Después de que el médico completa la visita virtual de video con el paciente, trabajan juntos para implementar cualquier cambio en el plan de atención domiciliaria de NP.

Algunos profesionales de la salud informaron dificultades mientras atendían en forma remota a los pacientes con NP en casa. Algunos de los recursos no están disponibles cuando se trabaja fuera de la institución. Otros informaron dificultades para obtener los exámenes de laboratorio de los pacientes con NP porque los pacientes no se los hicieron debido a problemas con la coordinación con las compañías de cuidado ambulatorio o la muestra de sangre se contaminaba o se coagulaba cuando personal inexperto hacía la toma de muestras. Otros profesionales de la salud encuestados estuvieron de acuerdo con lo anterior por lo que están ampliando la frecuencia de las órdenes de exáme-

nes de laboratorio, siempre que sea posible. Tener un paciente con NP domiciliaria con una infección es preocupante, ya que el manejo habitual es que el paciente asista al hospital, se evalúe y se ingrese en caso necesario. Durante esta pandemia, y con los hospitales cerrados, un profesional de la salud puede dudar en enviar al paciente al servicio de urgencias. Sin embargo, es importante continuar con la recomendación de asistir a la sala de urgencias, dado el caso que presente síntomas de las infecciones de la línea central o complicaciones relacionadas con la NP domiciliaria que no puedan tratarse virtualmente o en un consultorio.

Un profesional de la salud informó que su centro está haciendo un estudio sobre la satisfacción del paciente con las visitas virtuales. Piensa que la satisfacción del paciente será positiva debido a que no pierde tiempo conduciendo hacia el consultorio, y los médicos, nutricionistas-dietistas y otros miembros del equipo de atención médica son puntuales con la visita virtual. Otros médicos informan disminución de nuevos pacientes con NP ambulatoria en los últimos meses y aquellos que la reciben no pueden hacerse pruebas de diagnóstico ni procedimientos de rutina.

Al igual que la NE ambulatoria en casa, una de las dificultades que informaron los pediatras es garantizar que los cuidadores puedan pesar o medir adecuadamente a su hijo. Uno de los beneficios de la telesalud es ser capaz de conocer a todos los miembros de la familia ya que anteriormente quizás ambos padres no pudieron asistir previamente a las citas con su hijo. Al igual que en el hospital, un problema grave es la escasez de EPP y las compañías de cuidado ambulatorio están racionando estos suministros. Con el objeto de evitar ingresos hospitalarios por infecciones del torrente sanguíneo asociadas a la vía central, un grupo de médicos querían usar sellos de etanol en los catéteres centrales, pero no pudieron hacerlo por los costos de este producto.

### ***Otras Situaciones Clínicas***

#### ***Tutorías***

Un farmacéutico informó que actualmente tiene un residente de farmacia y comenta la dificultad de hacer la tutoría con todos los cambios en la práctica. Se comunican durante todo el día por teléfono, mensajes de texto y una plataforma de conferencia virtual. Gran parte de la capacitación es sobre el ingreso de pedidos de NP y la documentación segura en el EHR. Uno de los componentes de entrenamiento más grandes que faltan durante esta pandemia es la capacidad de realizar el NFPE y el aprendizaje práctico sobre sondas de alimentación enteral, catéteres venosos centrales y drenajes de líquidos corporales. Enseñar a los internos en nutrición y dietética de forma remota no les brinda la experiencia para desarrollar el instinto clínico de que algo no está bien, pero si hubieran podido visualizar a un paciente, el problema podría identificarse con facilidad.

#### ***Problemas de seguridad y tecnología***

Algunas de las tecnologías de telesalud, como las plataformas de videoconferencia como Zoom, pueden plantear problemas de seguridad. Algunos hospitales pueden tener licencias disponibles para descargar Skype para Negocios y Zoom compatibles con HIPAA. Es importante saber qué aplicaciones están utilizando las instituciones, especialmente si se trata de discutir acerca de los pacientes o si se está compartiendo información privada sobre la pantalla. Las dificultades con la computadora tales como el acceso, la velocidad de Internet y el ancho de banda, pueden ser problemáticas. No todos los programas de software disponibles en las computadoras en el trabajo están disponibles de forma remota o pueden funcionar de manera diferente con las computadoras en la casa.

### ***Entrega del Servicio de Comida en el Hospital***

La entrega de alimentos en el hospital también se ha modificado. Algunos de los hospitales que antes proporcionaban servicio a la habitación para la entrega de comidas ha cambiado a un horario estándar. El servicio de comida cambia hacia el empleo de bandejas desechables para las unidades de atención a pacientes que tienen COVID-19. Esto es para facilidad de las enfermeras que deben entrar y salir rápidamente de la habitación del paciente y pueden deshacerse de las bandejas usadas en el bote de basura de la habitación. El equipo de servicio de alimentos entrega el carrito de bandejas y luego las enfermeras pasan las comidas a los pacientes cuando prestan atención grupal. El horario de entrega del desayuno se ha ajustado a que sea más temprano, de manera que le permita agrupar las diferentes funciones a la enfermera. De esta manera, la del turno de la noche entrega el desayuno en conjunto con los cuidados requeridos. Entre las dificultades está que la enfermera pueda llevar la bandeja a la habitación a la hora de comer. Las bandejas desechables no mantienen la comida caliente como sucede con el sistema estándar de comidas en el hospital y si se pierde su entrega, entonces se requiere una entrada adicional en la habitación del paciente, requiriendo el empleo extra de EPP. No hay reporte de cambios informados en la solicitud en el suministro o empleo de suplementos nutricionales orales, aunque puede ser más difícil evaluar la cantidad consumida.

### ***Estrés en Pacientes y Profesionales de la Salud de soporte nutricional***

Varios profesionales de la salud informaron que se han enfrentado con la dificultad de que los pacientes y los familiares no se puedan ver. Los pacientes dudan en ir al consultorio o al hospital cuando no pueden ser acompañados por su cónyuge u otros miembros de la familia. Los profesionales de la salud informaron que era angustiante cuando los pacientes se imaginaban que irían al hospital sin la presencia física de un ser querido, y la dificultad se hizo mayor al manejar las complicaciones de la atención crítica y crónica, como la atención del paciente con cáncer.

Los profesionales de la salud también informaron sobre el estrés individual al adaptarse al trabajo en casa, esto incluye fatiga y dolor de espalda. En general, se sintieron más obligados a quedarse sentados trabajando con tiempo limitado para levantarse. Esto se ajustó levantándose con frecuencia y tomándose descansos entre 10 a 15 minutos y haciendo estiramientos antes de acostarse. También notaron que era más difícil concentrarse con los miembros de la familia que interrumpían la jornada laboral y, por lo tanto, era necesario establecer límites / reglas. Un profesional de la salud informó que el trabajo lleva más tiempo ya que la mayoría de la información se realiza mediante revisiones de cuadros en lugar de una observación directa realizada en conjunto y comunicándose con los profesionales de la salud tratantes. Un área que se necesita abordar es el impacto financiero en los sistemas de salud debido a la falta de procedimientos electivos y la disminución de la cantidad de pacientes. Los profesionales de la salud encuestados expresaron su preocupación por la situación económica y la seguridad laboral, ya que informan una disminución en el número de horas de trabajo, la utilización obligatoria de licencia remunerada, permisos y despidos.

### ***Recursos***

Algunos profesionales de la salud informaron que con la urgencia de tener que trabajar de forma remota, se fueron sin contactos y no pueden regresar al hospital para recuperarlos. Los profesionales de soporte nutricional crearon o accedieron a importantes recursos por vía electrónica. Un equipo creó un directorio telefónico en una hoja de cálculo para que los profesionales de la salud puedan acceder fácilmente a los números de uso frecuente en lugar de tener que buscarlos uno por uno. Muchos informaron que el documento "Terapia de Nutrición en el Paciente con Enfermedad COVID-19 que Requiere Atención en la UCI" se utiliza como una referencia importante y oportuna para los equipos

de soporte nutricional y esto se demuestra por la gran cantidad de descargas de este documento<sup>3</sup>. Una nutricionista dietista creó una hoja de sugerencia para las enfermeras de la UCI animándolas a proporcionar NE a los pacientes que están en posición de decúbito prono. Otro miembro del equipo de soporte nutricional preparó un algoritmo basado en las recomendaciones publicadas de ASPEN y SCCM sobre cómo tratar al paciente de cuidados críticos COVID-19 para que los nutricionistas-dietistas de servicios ambulatorios tengan una herramienta para emplearla y en el caso de aumentar el volumen de pacientes en cuidados intensivos, les puedan ayudar a cuidar a los pacientes.

### **Conclusión**

Este documento caracteriza las dificultades de atención nutricional y los cambios en los procesos que se han producido en respuesta a la pandemia de COVID-19. Los profesionales de soporte nutricional están promoviendo una nutrición adecuada en esta población de pacientes y haciendo esfuerzos para mantener prácticas seguras en consultorios ambulatorios alrededor de todo el espectro de atención para aquellos en UCI. Las recomendaciones de práctica basadas en evidencia son de mayor utilidad en estos pacientes en la medida que se modifican los procesos de atención estándar, mientras se conoce más sobre este nuevo virus. En caso de que ocurra una segunda ola de la pandemia de COVID-19 a fines del 2020 o principios de 2021, este llamado a las modificaciones de los procesos de nutrición clínica y el informe se repetirán para evaluar los patrones de práctica y las lecciones aprendidas.

### **Reconocimiento**

A ASPEN le gustaría agradecer a los numerosos contribuyentes a este informe cualitativo y a todos los miembros de ASPEN por su arduo trabajo y atención nutricional brindada durante estos tiempos difíciles.

## Referencias

1. Wu C, Chen X, Cai Y, et al. Risk factors associated with acute respiratory distress syndrome and death in patients with coronavirus disease 2019 pneumonia in Wuhan, China. *JAMA Intern Med.* 2020 Mar 13. doi: 10.1001/jamainternmed.2020.0994. [Epub ahead of print].
2. Richardson S, Hirsch JS, Narasimhan M, et al. Presenting characteristics, comorbidities, and outcomes among 5700 patients hospitalized with COVID-19 in the New York City area. *JAMA* 2020 April 22 *JAMA.* 2020 Apr 22. doi: 10.1001/jama.2020.6775. [Epub ahead of print]
3. Martindale R, Patel JJ, Taylor B, Warren M, McClave SA, ASPEN and SCCM. Nutrition therapy in the patient with COVID-19 disease requiring ICU care. April 2020. [https://www.nutritioncare.org/uploadedFiles/Documents/Guidelines\\_and\\_Clinical\\_Resources/Nutrition%20Therapy%20COVID-19\\_SCCM-ASPEN.pdf](https://www.nutritioncare.org/uploadedFiles/Documents/Guidelines_and_Clinical_Resources/Nutrition%20Therapy%20COVID-19_SCCM-ASPEN.pdf)
4. Coronavirus Aid, Relief and Economic Security (CARES) Act. PL 116-136. Congressional Record. March 27, 2020; Vol. 166, No. 61.
5. McClave SA, Taylor BE, Martindale RG, et al. Guidelines for the provision and assessment of nutrition support therapy in the adult critically ill patient: Society of Critical Care Medicine (SCCM) and American Society for Parenteral and Enteral Nutrition (ASPEN) .*JPEN J Parenter Enteral Nutr.* 2016;40(2):159-211. Corrigendum. *JPEN J Parenter Enteral Nutr.* 2016; 40(8):1200.
6. Singer P, Blaser AR, Berger MM, et al. ESPEN Guideline on clinical nutrition in the intensive care unit. *Clin Nutr.* 2019;38(1):48-79.
7. Patel JJ, Rice T, Heyland DK. Safety and outcomes of early enteral nutrition in circulatory shock. (published online ahead of print, 2020 Feb 12). *JPEN J Parenter Enteral Nutr.* 2020:10.1002/jpen.1793. doi: 10.1002/jpen.1793tel.
8. Boullata JI, Carrera AL, Harvey L, et al. ASPEN safe practices for enteral nutrition. *JPEN J Parenter Enteral Nutr.* 2017;41(1):15
9. ASPEN and SCCM Webinar. Managing Nutrition Support for Critically Ill COVID-19 Patients. May 1, 2020. <https://www.youtube.com/watch?v=0stk4Hje3TU&feature=youtu.be>
10. Boullata JI. Overview of the parenteral nutrition use process. *JPEN J Parenter Enteral Nutr.* 2012;36(2S):10S-13S.
11. Ayers P, Adams S, Boullata J, et al. ASPEN parenteral nutrition safety consensus recommendations. *JPEN J Parenter Enteral Nutr.* 2014;38(3):296-333.
12. Institute for Safe Medication Practices. room for COVID-19 patients. Medication Safety Alert! 2020;25(6)Supplement:1-4. <https://www.ismp.org/sites/default/files/newsletter-issues/20200403.pdf>
